# Supplementary material for: A widespread viral entry mechanism: The C-end Rule motif–neuropilin receptor interaction
Source: PubMed Central journal article supplement — Proc Natl Acad Sci U S A. 2021 Nov 12;118(49):e2112457118. doi: 10.1073/pnas.2112457118 (PMC8670474; doi:10.1073/pnas.2112457118), 2021-11-12
Supplement: pnas.2112457118.sapp.pdf [file pnas.2112457118.sapp.pdf]

## SI APPENDIX

### **A Widespread Viral Entry Mechanism: the C-end Rule Motif-Neuropilin Receptor Interaction**

*Giuseppe Balistreri<sup>1,2\*</sup>, Yohei Yamauchi<sup>3,4\*</sup> and Tambet Teesalu<sup>5,6\*</sup>*

<sup>1</sup> Department of Virology, Faculty of Medicine, University of Helsinki, Helsinki, Finland

<sup>2</sup> Queensland Brain Institute, The University of Queensland, Brisbane, Australia

<sup>3</sup> School of Cellular and Molecular Medicine, Faculty of Life Sciences, University of Bristol, UK

<sup>4</sup> Division of Biological Science, Graduate School of Science, Nagoya University, Japan

<sup>5</sup> Laboratory of Precision and Nanomedicine, University of Tartu, Estonia

<sup>6</sup> Center for Nanomedicine, University of California Santa Barbara, USA.

\* Equal contribution

Table S1. Examples of viral spike proteins harbouring CendR motifs.

| <b>Family</b>           | <b>Representative virus</b>                                                                   | <b>Spike protein</b> | <b>Viral membrane</b> | <b>Genome</b> |
|-------------------------|-----------------------------------------------------------------------------------------------|----------------------|-----------------------|---------------|
| <i>Orthomyxoviridae</i> | Influenza H5N1                                                                                | HA                   | yes                   | ssRNA (-)     |
| <i>Paramyxoviridae</i>  | Measles, Respiratory Syncytia virus, Nipah                                                    | F                    | yes                   | ssRNA (-)     |
| <i>Filoviridae</i>      | Ebola, Marburg virus                                                                          | GP                   | yes                   | ssRNA (-)     |
| <i>Coronaviridae</i>    | SARS-CoV-2, Middle East Respiratory Syndrome (MERS)-CoV                                       | S                    | yes                   | ssRNA (+)     |
| <i>Flaviviridae</i>     | Dengue, Zika, Tick borne encephalitis, West Nile, Yellow fever virus                          | E                    | yes                   | ssRNA (+)     |
| <i>Arenaviridae</i>     | Lujo, Junin virus                                                                             | Gp                   | yes                   | ssRNA (+)     |
| <i>Togaviridae</i>      | Chikungunya, Semliki Forest virus                                                             | E                    | yes                   | ssRNA (+)     |
| <i>Retroviridae</i>     | Human Immunodeficiency virus, Leukemia retroviruses                                           | Env                  | yes                   | ssRNA(-)/RT   |
| <i>Hepadnaviridae</i>   | Hepatitis B virus                                                                             | S, M, L (?)          | yes                   | ssDNA(-)/RT   |
| <i>Herpesviridae</i>    | Herpes simplex, Cytomegalo, Epstein-Barr, Kaposi's sarcoma associated, Varicella-zoster virus | gB                   | yes                   | dsDNA         |
| <i>Papillomaviridae</i> | Human Papilloma virus                                                                         | L                    | no                    | dsDNA         |
